# Supplementary material for: Novel layered Bi3MoMTO9 (MT = Mn, Fe, Co and Ni) thin films with tunable multifunctionalities
Source: Royal Society of Chemistry journal article supplement (doi:10.1039/d0nr00083c), 2020-01-01
Supplement: d0nr00083c1.pdf [file d0nr00083c1.pdf]

## Supplementary Information

Novel layered  $\text{Bi}_3\text{MoM}_T\text{O}_9$  ( $M_T = \text{Mn, Fe, Co and Ni}$ ) thin films with tunable multifunctionalities

Xingyao Gao,<sup>1</sup> Leigang Li,<sup>1</sup> Di Zhang,<sup>1</sup> Xuejing Wang,<sup>1</sup> Jie Jian,<sup>1</sup> Zihao He,<sup>2</sup> and Haiyan Wang<sup>1,2\*</sup>

<sup>1</sup>School of Materials Engineering, Purdue University, West Lafayette, IN 47907, United States

<sup>2</sup>School of Electrical and Computer Engineering, Purdue University, West Lafayette, IN 47907, United States

\*To whom correspondence should be addressed: [hwang00@purdue.edu](mailto:hwang00@purdue.edu)

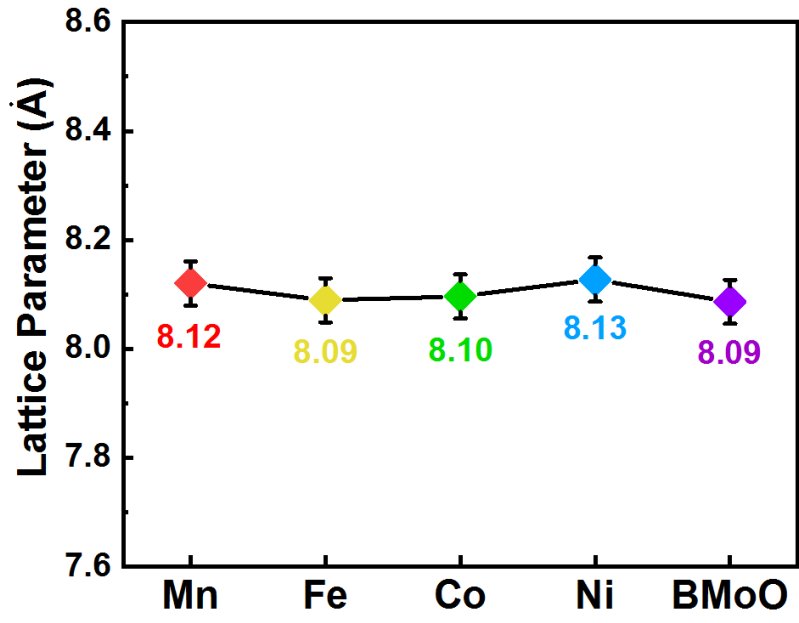

**Fig. S1.** Out-of-plane lattice parameters of BMoM<sub>T</sub>O and BMoO thin films.

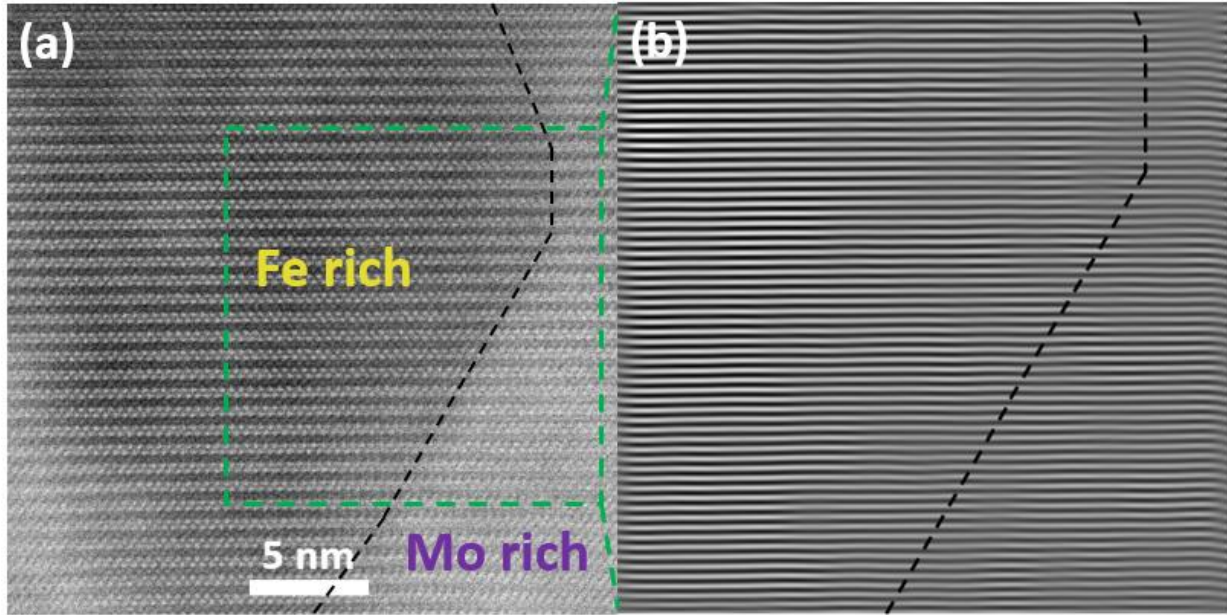

**Fig. S2.** (a) HRTEM image of the BMoFeO thin film, while the black dashed line indicates the domain boundary. (b) Fast-Fourier transform (FFT) filtered image of the BMoFeO thin film.

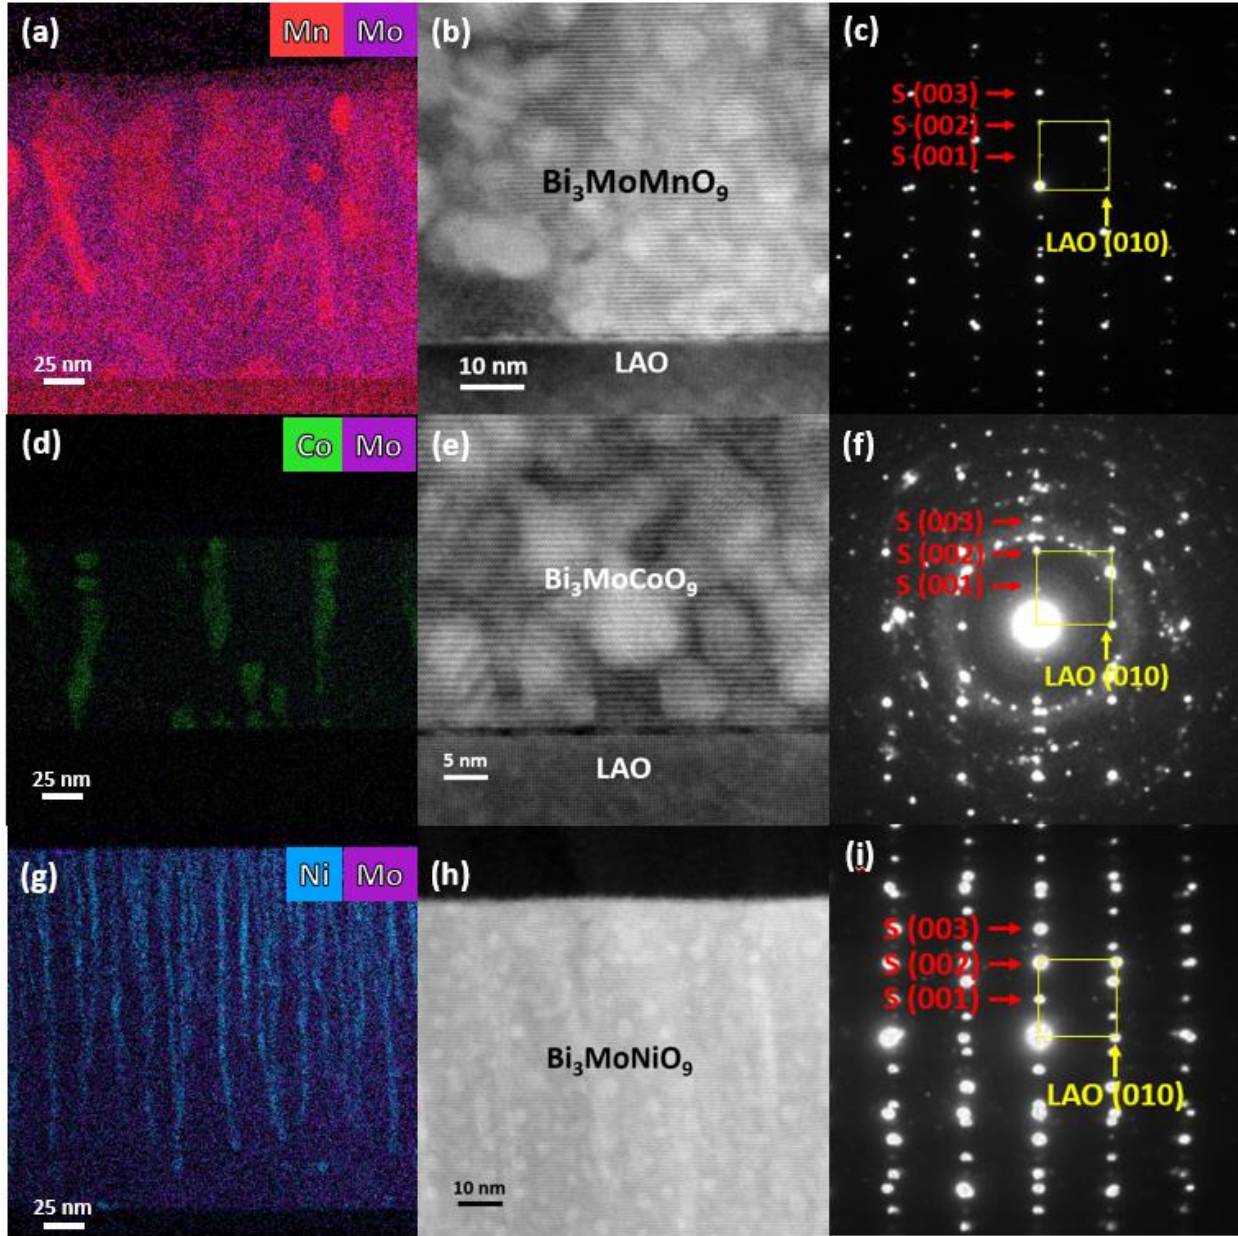

**Fig. S3.** Cross-sectional energy-dispersive X-ray spectra (EDS) mappings (left); STEM images (middle); and selected area electron diffraction (SAED) patterns (right) of: (a-c) BiMoMnO (d-f) BiMoCoO and (g-i) BiMoNiO thin films.

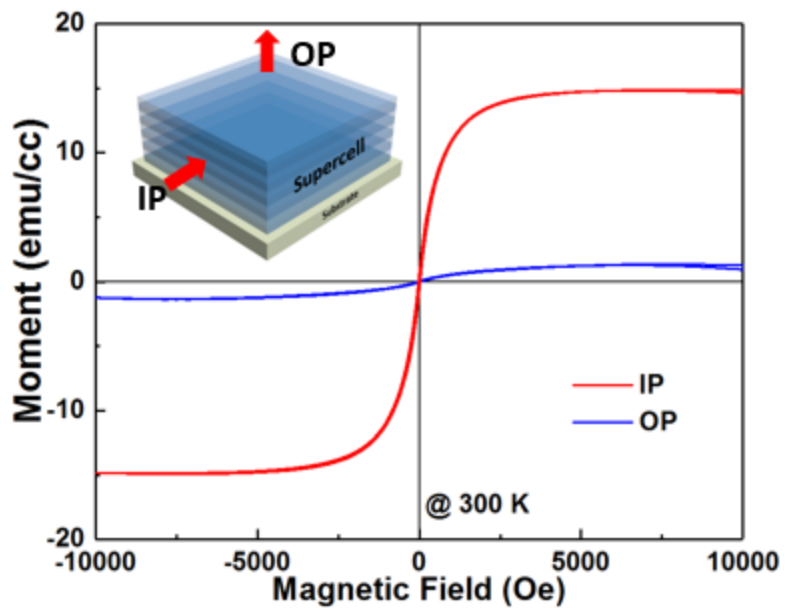

**Fig. S4.** Room temperature magnetic hysteresis loops with magnetic field applied in ip-plane and out-of-plane directions of BMOO film. The inset shows the corresponding magnetic field direction.

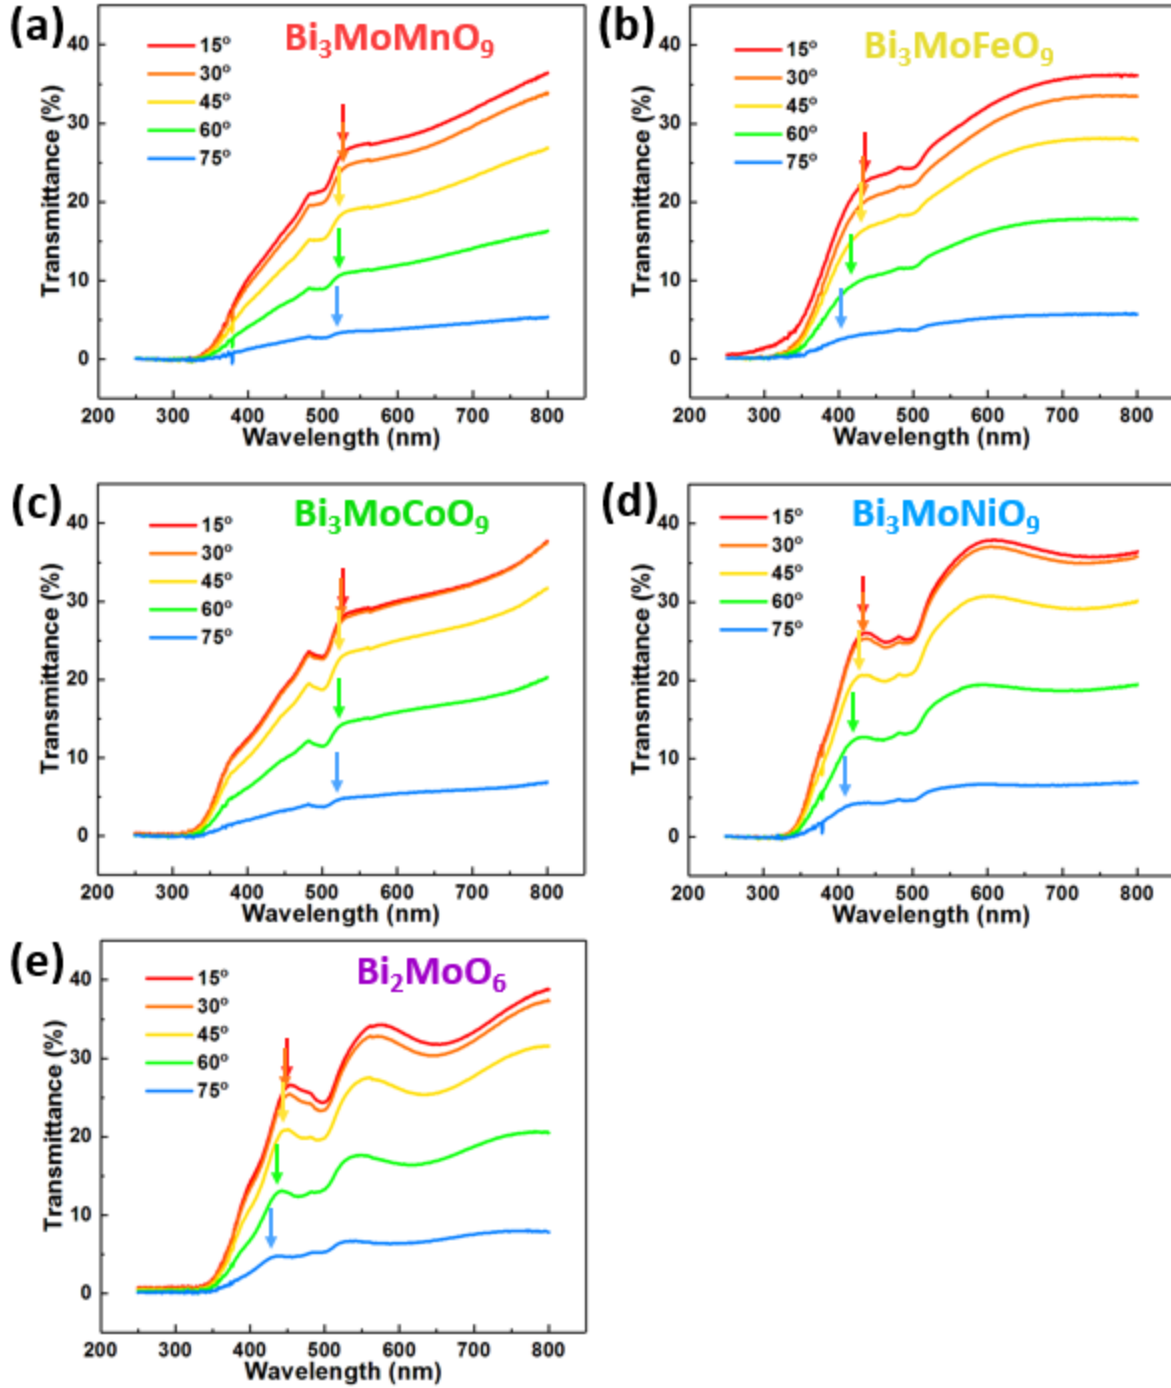

**Fig. S5.** (a-d) Angular dependence of the transmittance spectra of the BMoM<sub>T</sub>O films with different elements (Mn, Fe, Co and Ni, respectively). (e) Angular dependence of the transmittance spectra of the BMoO film.
